# Supplementary material for: Extension of Equivalent System Mass for Human Exploration Missions on Mars
Source: Preprints.org preprint supplement (doi:10.20944/preprints202101.0363.v1), 2021-01-18
Supplement: Supplementary file 2 [file supplementary]

## Sheet: Scenario Overview
Scenario	Predeployment	Initial Transit	Surface	Return Transit
1 (P1-T3-S2)	0	Transit food + biomanufacturing + 50 days of food +210 days return food	500 days of operation	210 days food
2 (P1-T4-S1)	0	Bring transit food + 500 days food + 210 days return food	No Biomanufacturing	210 days food
5 (P4-T2-S2)	Send biomanufacturing system	Bring transit time food + 50 days food + 210 days return food	500 days of operation	210 days food
Segment	Leq (kg/kg)	Veq (kg/m^3)	Peq (kg/kW)	Ceq (kg/kW)	Teq	Number of Days	Number of days food eaten
pd (P)	2.77	9.16	237	40	0.7	210	0
tr (T)	10	133.8	136	50	0.7	420	420
su (S)	1	9.16	228	145	0.7	500	500
Scenario 1
Summary	Predeployment	Transit to Mars	Surface Operations	Return Transit
Extended ESM	0	5605.93	2285.47	3854.73
Regular ESM	0	5605.93	5889.64	3854.73
Calculation with location factors	Predeployment	Transit to Mars	Surface Operations	Return Transit	Total
Extended ESM	0	56059.3	2285.47	38547.3	96892.1
Regular ESM	0	56059.3	5889.64	38547.3	100496
Scenario 2
Summary	Predeployment	Transit to Mars	Surface Operations	Return Transit
Extended ESM	0	9614.59	781.624	3854.73
Regular ESM	0	9614.59	8113.75	3854.73
Calculation with location factors	Predeployment	Transit to Mars	Surface Operations	Return Transit	Total
Extended ESM	0	96145.9	781.624	38547.3	135475
Regular ESM	0	96145.9	8113.75	38547.3	142807
Scenario 3
Summary	Predeployment	Transit to Mars	Surface Operations	Return Transit
Extended ESM	399.16	5206.77	2285.47	3854.73
Regular ESM	399.16	5206.77	5889.64	3854.73
Calculation with location factors	Predeployment	Transit to Mars	Surface Operations	Return Transit	Total
Extended ESM	1105.67	52067.7	2285.47	38547.3	94006.2
Regular ESM	1105.67	52067.7	5889.64	38547.3	97610.3

## Sheet: Scenario 1
Scenario	Predeployment	Transit	Surface	Return Transit
1 (P1-T3-S2)	0	Initial transit food + biomanufacturing + 50 days of food + 210 days return transit food	500 days of operation	210 days prepackaged food
Assumptions	Data Source	Value		Location and Equivalency Factor Assumptions
Daily Dry Mass Food Requirements	BVAD ( Page 122)	0.617 (kg/CM-d)		Segment	Leq (kg/kg)	Veq (kg/m^3)	Peq (kg/kW)	Ceq (kg/kW)	Teq	Number of Days	Number of days food eaten
Volume Associated with Daily Food Requirement	BVAD (Page 122)	1.33*10^-3 m^3/kg		pd (P)	2.77	9.16	237	40	0.7	210	0
Water Volume Daily	Inferred from BVAD (Page 122)	0.004 (m^3/CM-d)		tr (T)	10	9.16	136	50	0.7	410	410
Packaging mass from Dry Mass Requirements	BVAD (Page 122)	\+16.5% of food		su (S)	1	9.16	228	145	0.7	500	500
Packing volume from Dry Mass Requirements	Inferred from BVAD (Page 122)	\+16.5% of food
Fridge Mass	BVAD (Page 119)	321 kg (Refrigerator/freezer mode)
Fridge Volume	BVAD (Page 119)	2 m^3 (Rack included)
Fridge Power	BVAD (Page 119)	0.205 kW
Fridge Cooling	BVAD (Page 119)	0.228 kW
Crop Storage Volume Factor	BVAD (Page 123)	7.69*10^-3 m^3/kg
LED lighting system for crop growth - power requirement	Hardy ICES 2020	0.221 kW
Biomanufacturing System - not including lighting system	ALSSAT	Varies based on mission segment
Food processing Requirements	ALSSAT	Varies based on mission segment
Predeployment - 210 days, 6 CMs
Data Source	Segment	Item	M (kg)	V (m^3)	P (kW)	C (kW)	T	ESM Total
N/a	N/a	N/a	N/a	N/a	N/a	N/a	N/a	N/a
								0
Transit to Mars - 210 days, 6 CMs
Data Source	Subsystem	Item	M (kg)	V (m^3)	P (kW)	C (kW)	T	ESM Total
ALSSAT	BioM	Crop reactor/Plant growth chamber	399.16	N/a	N/a	N/a	N/a	399.16
ALSSAT	BioM	Crop storage	N/a	N/a	N/a	N/a	N/a	N/a
BVAD	Food	Food - 210 (initial transit) + 50 (surface) + 210 (return)	1739.94	2.31412	N/a	N/a	1.5	1981.64
BVAD	Food	Packaging	2027.03	2.69595	N/a	N/a	N/a	2051.73
BVAD	Food	Fridges - 3 needed	963	6	0.615	0.684	0	1135.8
ALSSAT	Food	Processing	36.6	0.09	0.001	0.001	0	37.6104
								5605.93
Extended ESM											Regular ESM
Surface Operations - 500 days, 6 CMs											Surface Operations - 500 days, 6 CMs
Data Source	Subsystem	Item	M (kg)	V (m^3)	P (kW)	C (kW)	T	ESM Total			Data Source	Subsystem	Item	M	V	P	C	T	ESM Total
ALSSAT	BioM	Crop reactor/Plant growth chamber	399.16	N/a	0.221	0.221	0	82.433			ALSSAT	BioM	Crop reactor/Plant growth chamber	399.16	N/a	0.221	0.221	0	481.593
ALSSAT	BioM	Crop storage	1665.9	12.8	N/a	N/a	0	1783.15			ALSSAT	BioM	Crop storage	1665.9	12.8	N/a	N/a	0	1783.15
BVAD	Food	Food - 50 (surface) + 210 (return)	962.52	1.28015	N/a	N/a	1.5	232.226			BVAD	Food	Food - 50 (surface) + 210 (return)	962.52	1.28015	N/a	N/a	1.5	1194.75
BVAD	Food	Packaging	1121.34	1.49138	N/a	N/a	0	13.661			BVAD	Food	Packaging	1121.34	1.49138	N/a	N/a	0	1135
BVAD	Food	Fridges - 3 needed	963	6	0.615	0.684	0	172.8			BVAD	Food	Fridges - 5 needed	963	6	0.615	0.684	0	1257.36
ALSSAT	Food	Processing	36.6	0.09	0.001	0.001	0	1.1974			ALSSAT	Food	Processing	36.6	0.09	0.001	0.001	0	37.7974
								2285.47											5889.64
Extended ESM											Regular ESM
Return Transit - 210 days, 6 CMs											Return Transit - 210 days, 6 CMs
Data Source	Subsystem	Item	M	V	P	C	T	ESM Total			Data Source	Subsystem	Item	M	V	P	C	T	ESM Total
ALSSAT	BioM	Crop reactor/Plant growth chamber	N/a	N/a	N/a	N/a	N/a	N/a			ALSSAT	BioM	Crop reactor/Plant growth chamber	N/a	N/a	N/a	N/a	N/a	N/a
ALSSAT	BioM	Crop storage	N/a	N/a	N/a	N/a	N/a	N/a			ALSSAT	BioM	Crop storage	N/a	N/a	N/a	N/a	N/a	N/a
BVAD	Food	Food - 210 (return)	777.42	1.03397	N/a	N/a	1.5	1007.39			BVAD	Food	Food - 210 (return)	777.42	1.03397	N/a	N/a	1.5	1007.39
BVAD	Food	Packaging	905.694	1.20457	N/a	N/a	N/a	916.728			BVAD	Food	Packaging	905.694	1.20457	N/a	N/a	N/a	916.728
BVAD	Food	Fridges - 5 needed	1605	10	1.025	1.14	0	1893			BVAD	Food	Fridges - 5 needed	1605	10	1.025	1.14	0	1893
ALSSAT	Food	Processing	36.6	0.09	0.001	0.001	0	37.6104			ALSSAT	Food	Processing	36.6	0.09	0.001	0.001	0	37.6104
								3854.73											3854.73
Summary	Predeployment	Transit to Mars	Surface Operations	Return Transit
Extended ESM	0	5605.93	2285.47	3854.73
Regular ESM	0	5605.93	5889.64	3854.73
Calculation with location factors	Predeployment	Transit to Mars	Surface Operations	Return Transit	Total
Extended ESM	0	56059.3	2285.47	38547.3	96892.1
Regular ESM	0	56059.3	5889.64	38547.3	100496

## Sheet: Scenario 2
Scenario (6 CMs)	Predeployment	Transit (210 days)	Surface (500 days)	Return Transit (210 days)
2 (P1-T4-S1)	0	Bring transit food + 500 days food + return transit food	No Biomanufacturing	Return Transit Food
Assumptions	Data Source	Value		Location and Equivalency Factor Assumptions
Daily Dry Mass Food Requirements	BVAD ( Page 122)	0.617 (kg/CM-d)		Segment	Leq (kg/kg)	Veq (kg/m^3)	Peq (kg/kW)	Ceq (kg/kW)	Teq	Number of Days	Number of days food eaten
Volume Associated with Daily Food Requirement	BVAD (Page 122)	1.33*10^-3 m^3/kg		pd (P)	2.77	9.16	237	40	0.7	210	0
Water Volume Daily	Inferred from BVAD (Page 122)	0.004 (m^3/CM-d)		tr (T)	10	9.16	136	50	0.7	410	410
Packaging mass from Dry Mass Requirements	BVAD (Page 122)	\+16.5% of food		su (S)	1	9.16	228	145	0.7	500	500
Packing volume from Dry Mass Requirements	Inferred from BVAD (Page 122)	\+16.5% of food
Fridge Mass	BVAD (Page 119)	321 kg (Refrigerator/freezer mode)
Fridge Volume	BVAD (Page 119)	2 m^3 (Rack included)
Fridge Power	BVAD (Page 119)	0.205 kW
Fridge Cooling	BVAD (Page 119)	0.228 kW
Crop Storage Volume Factor	BVAD (Page 123)	7.69*10^-3 m^3/kg
LED lighting system for crop growth - power requirement	Hardy ICES 2020	0.221 kW
Biomanufacturing System	ALSSAT	Varies based on mission segment
Food processing Requirements	ALSSAT	Varies based on mission segment
Predeployment - 210 days, 6 CMs
Data Source	Segment	Item	M	V	P	C	T	ESM Total
N/a	N/a	N/a	N/a	N/a	N/a	N/a	N/a	N/a
								0
Transit to Mars - 210 days, 6 CMs
Data Source	Subsystem	Item	M	V	P	C	T	ESM Total
ALSSAT	BioM	Crop reactor/Plant growth chamber	N/a	N/a	N/a	N/a	N/a	N/a
ALSSAT	BioM	Crop storage	N/a	N/a	N/a	N/a	N/a	N/a
BVAD	Food	Food - 210 (initial transit) + 500 (surface) + 210 (return)	3405.84	4.52977	N/a	N/a	1.5	3667.83
BVAD	Food	Packaging	3967.8	5.27718	N/a	N/a	N/a	4016.14
BVAD	Food	Fridges - 5 needed	1605	10	1.025	1.14	0	1893
ALSSAT	Food	Processing	36.6	0.09	0.001	0.001	0	37.6104
								9614.59
Extended ESM											Regular ESM
Surface Operations - 500 days, 6 CMs											Surface Operations - 500 days, 6 CMs
Data Source	Subsystem	Item	M	V	P	C	T	ESM Total			Data Source	Subsystem	Item	M	V	P	C	T	ESM Total
ALSSAT	BioM	Crop reactor/Plant growth chamber	N/a	N/a	N/a	N/a	N/a	N/a			ALSSAT	BioM	Crop reactor/Plant growth chamber	N/a	N/a	N/a	N/a	N/a	N/a
ALSSAT	BioM	Crop storage	N/a	N/a	N/a	N/a	N/a	N/a			ALSSAT	BioM	Crop storage	N/a	N/a	N/a	N/a	N/a	N/a
BVAD	Food	Food - 500 (surface) + 210 (return)	2628.42	3.4958	N/a	N/a	1.5	252.522			BVAD	Food	Food - 500 (surface) + 210 (return)	2628.42	3.4958	N/a	N/a	1.5	2880.94
BVAD	Food	Packaging	3062.11	4.07261	N/a	N/a	N/a	37.3051			BVAD	Food	Packaging	3062.11	4.07261	N/a	N/a	N/a	3099.41
BVAD	Food	Fridges - 5 needed	1605	10	1.025	1.14	0	490.6			BVAD	Food	Fridges - 5 needed	1605	10	1.025	1.14	0	2095.6
ALSSAT	Food	Processing	36.6	0.09	0.001	0.001	0	1.1974			ALSSAT	Food	Processing	36.6	0.09	0.001	0.001	0	37.7974
								781.624											8113.75
Extended ESM											Regular ESM
Return Transit - 210 days, 6 CMs											Return Transit - 210 days, 6 CMs
Data Source	Subsystem	Item	M	V	P	C	T	ESM Total			Data Source	Subsystem	Item	M	V	P	C	T	ESM Total
ALSSAT	BioM	Crop reactor/Plant growth chamber	N/a	N/a	N/a	N/a	N/a	N/a			ALSSAT	BioM	Crop reactor/Plant growth chamber	N/a	N/a	N/a	N/a	N/a	N/a
ALSSAT	BioM	Crop storage	N/a	N/a	N/a	N/a	N/a	N/a			ALSSAT	BioM	Crop storage	N/a	N/a	N/a	N/a	N/a	N/a
BVAD	Food	Food - 210 (return)	777.42	1.03397	N/a	N/a	1.5	1007.39			BVAD	Food	Food - 210 (return)	777.42	1.03397	N/a	N/a	1.5	1007.39
BVAD	Food	Packaging	905.694	1.20457	N/a	N/a	N/a	916.728			BVAD	Food	Packaging	905.694	1.20457	N/a	N/a	N/a	916.728
BVAD	Food	Fridges - 5 needed	1605	10	1.025	1.14	0	1893			BVAD	Food	Fridges - 5 needed	1605	10	1.025	1.14	0	1893
ALSSAT	Food	Processing	36.6	0.09	0.001	0.001	0	37.6104			ALSSAT	Food	Processing	36.6	0.09	0.001	0.001	0	37.6104
								3854.73											3854.73
Summary	Predeployment	Transit to Mars	Surface Operations	Return Transit
Extended ESM	0	9614.59	781.624	3854.73
Regular ESM	0	9614.59	8113.75	3854.73
Calculation with location factors	Predeployment	Transit to Mars	Surface Operations	Return Transit	Total
Extended ESM	0	96145.9	781.624	38547.3	135475
Regular ESM	0	96145.9	8113.75	38547.3	142807

## Sheet: Scenario 3
Scenario	Predeployment	Transit	Surface	Return Transit
1 (P1-T3-S2)	Send Biomanufacturing System	Bring transit time food + 50 days food	500 days of operation	210 days grown food
Assumptions	Data Source	Value		Location and Equivalency Factor Assumptions
Daily Dry Mass Food Requirements	BVAD ( Page 122)	0.617 (kg/CM-d)		Segment	Leq (kg/kg)	Veq (kg/m^3)	Peq (kg/kW)	Ceq (kg/kW)	Teq	Number of Days	Number of days food eaten
Volume Associated with Daily Food Requirement	BVAD (Page 122)	1.33*10^-3 m^3/kg		pd (P)	2.77	9.16	237	40	0.7	210	0
Water Volume Daily	Inferred from BVAD (Page 122)	0.004 (m^3/CM-d)		tr (T)	10	9.16	136	50	0.7	410	420
Packaging mass from Dry Mass Requirements	BVAD (Page 122)	\+16.5% of food		su (S)	1	9.16	228	145	0.7	500	500
Packing volume from Dry Mass Requirements	Inferred from BVAD (Page 122)	\+16.5% of food
Fridge Mass	BVAD (Page 119)	321 kg (Refrigerator/freezer mode)
Fridge Volume	BVAD (Page 119)	2 m^3 (Rack included)
Fridge Power	BVAD (Page 119)	0.205 kW
Fridge Cooling	BVAD (Page 119)	0.228 kW
Crop Storage Volume Factor	BVAD (Page 123)	7.69*10^-3 m^3/kg
LED lighting system for crop growth - power requirement	Hardy ICES 2020	0.221 kW
Biomanufacturing System	ALSSAT	Varies based on mission segment
Food processing Requirements	ALSSAT	Varies based on mission segment
Predeployment - 210 days
Data Source	Subsystem	Item	M	V	P	C	T	ESM Total
ALSSAT	BioM	Crop reactor/Plant growth chamber	399.16	N/a	N/a	N/a	0	399.16
ALSSAT	BioM	Crop storage	N/a	N/a	N/a	N/a	N/a	N/a
								399.16
Transit to Mars - 210 days, 6 CMs
Data Source	Subsystem	Item	M (kg)	V (m^3)	P (kW)	C (kW)	T	ESM Total
ALSSAT	BioM	Crop reactor/Plant growth chamber	N/a	N/a	N/a	N/a	N/a	N/a
ALSSAT	BioM	Crop storage	N/a	N/a	N/a	N/a	N/a	N/a
BVAD	Food	Food - 210 (initial transit) + 50 (surface) + 210 (return)	1739.94	2.31412	N/a	N/a	1.5	1981.64
BVAD	Food	Packaging	2027.03	2.69595	N/a	N/a	N/a	2051.73
BVAD	Food	Fridges - 3 needed	963	6	0.615	0.684	0	1135.8
ALSSAT	Food	Processing	36.6	0.09	0.001	0.001	0	37.6104
								5206.77
Extended ESM											Regular ESM
Surface Operations - 500 days, 6 CMs											Surface Operations - 500 days, 6 CMs
Data Source	Subsystem	Item	M (kg)	V (m^3)	P (kW)	C (kW)	T	ESM Total			Data Source	Subsystem	Item	M	V	P	C	T	ESM Total
ALSSAT	BioM	Crop reactor/Plant growth chamber	399.16	N/a	0.221	0.221	0	82.433			ALSSAT	BioM	Crop reactor/Plant growth chamber	399.16	N/a	0.221	0.221	0	481.593
ALSSAT	BioM	Crop storage	1665.9	12.8	N/a	N/a	0	1783.15			ALSSAT	BioM	Crop storage	1665.9	12.8	N/a	N/a	0	1783.15
BVAD	Food	Food - 50 (surface) + 210 (return)	962.52	1.28015	N/a	N/a	1.5	232.226			BVAD	Food	Food - 50 (surface) + 210 (return)	962.52	1.28015	N/a	N/a	1.5	1194.75
BVAD	Food	Packaging	1121.34	1.49138	N/a	N/a	0	13.661			BVAD	Food	Packaging	1121.34	1.49138	N/a	N/a	0	1135
BVAD	Food	Fridges - 3 needed	963	6	0.615	0.684	0	172.8			BVAD	Food	Fridges - 5 needed	963	6	0.615	0.684	0	1257.36
ALSSAT	Food	Processing	36.6	0.09	0.001	0.001	0	1.1974			ALSSAT	Food	Processing	36.6	0.09	0.001	0.001	0	37.7974
								2285.47											5889.64
Extended ESM											Regular ESM
Return Transit - 210 days, 6 CMs											Return Transit - 210 days, 6 CMs
Data Source	Subsystem	Item	M	V	P	C	T	ESM Total			Data Source	Subsystem	Item	M	V	P	C	T	ESM Total
ALSSAT	BioM	Crop reactor/Plant growth chamber	N/a	N/a	N/a	N/a	N/a	N/a			ALSSAT	BioM	Crop reactor/Plant growth chamber	N/a	N/a	N/a	N/a	N/a	N/a
ALSSAT	BioM	Crop storage	N/a	N/a	N/a	N/a	N/a	N/a			ALSSAT	BioM	Crop storage	N/a	N/a	N/a	N/a	N/a	N/a
BVAD	Food	Food - 210 (return)	777.42	1.03397	N/a	N/a	1.5	1007.39			BVAD	Food	Food - 210 (return)	777.42	1.03397	N/a	N/a	1.5	1007.39
BVAD	Food	Packaging	905.694	1.20457	N/a	N/a	N/a	916.728			BVAD	Food	Packaging	905.694	1.20457	N/a	N/a	N/a	916.728
BVAD	Food	Fridges - 5 needed	1605	10	1.025	1.14	0	1893			BVAD	Food	Fridges - 5 needed	1605	10	1.025	1.14	0	1893
ALSSAT	Food	Processing	36.6	0.09	0.001	0.001	0	37.6104			ALSSAT	Food	Processing	36.6	0.09	0.001	0.001	0	37.6104
								3854.73											3854.73
Summary	Predeployment	Transit to Mars	Surface Operations	Return Transit
Extended ESM	399.16	5206.77	2285.47	3854.73
Regular ESM	399.16	5206.77	5889.64	3854.73
Calculation with location factors	Predeployment	Transit to Mars	Surface Operations	Return Transit	Total
Extended ESM	1105.67	52067.7	2285.47	38547.3	94006.2
Regular ESM	1105.67	52067.7	5889.64	38547.3	97610.3
